# Supplementary material
Source: Springer Nature journal article supplement (https://www.springermedizin.de/resource/supplementary/13075_2010_9696_MOESM5_ESM.pdf/9693314)

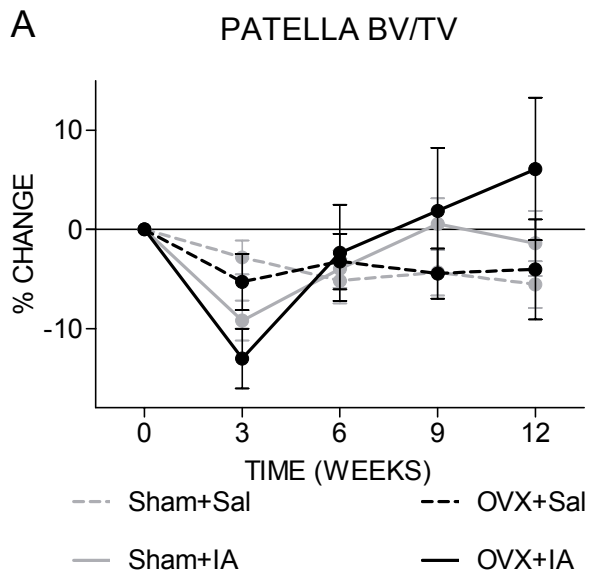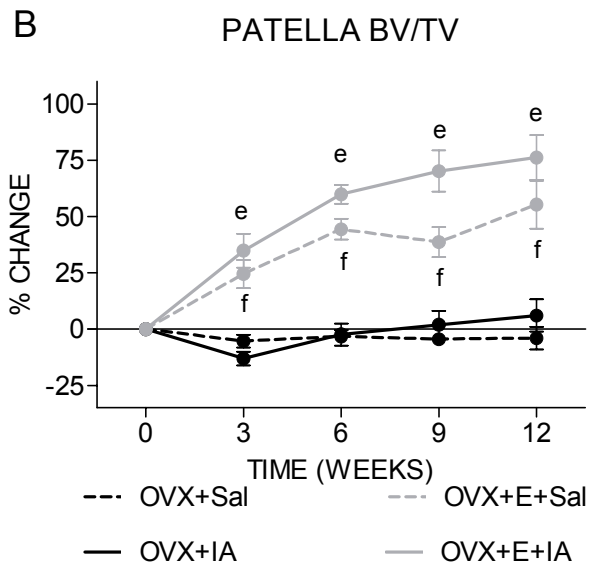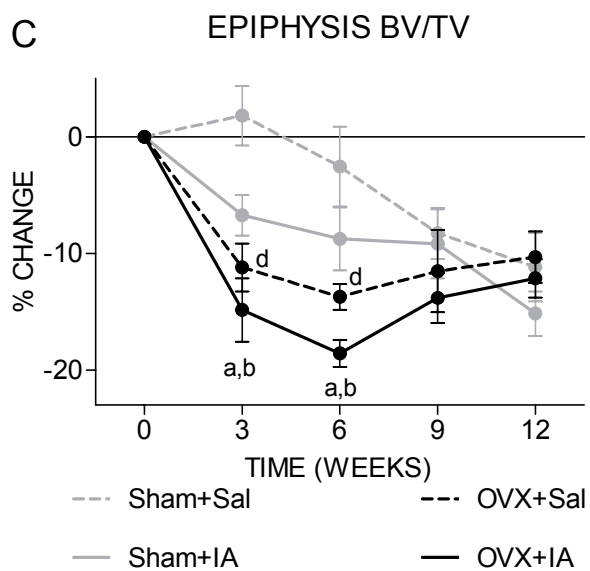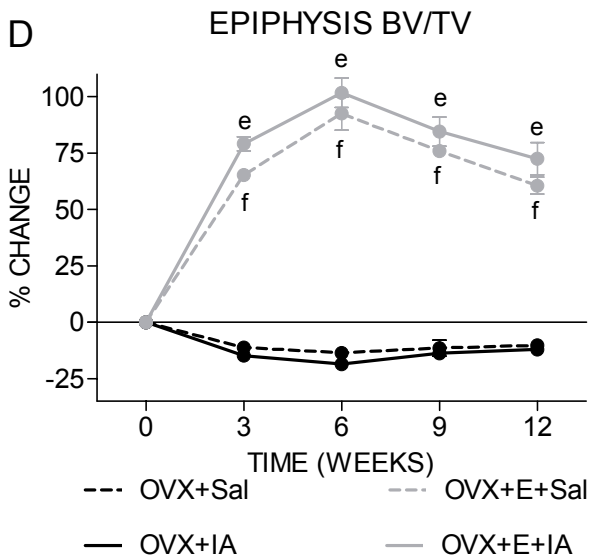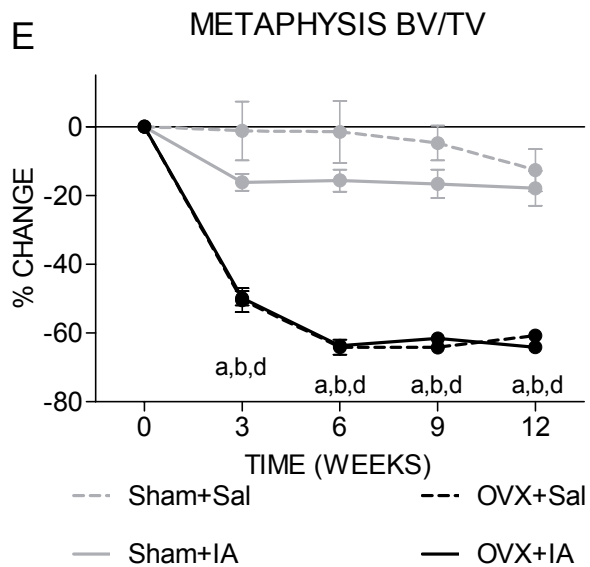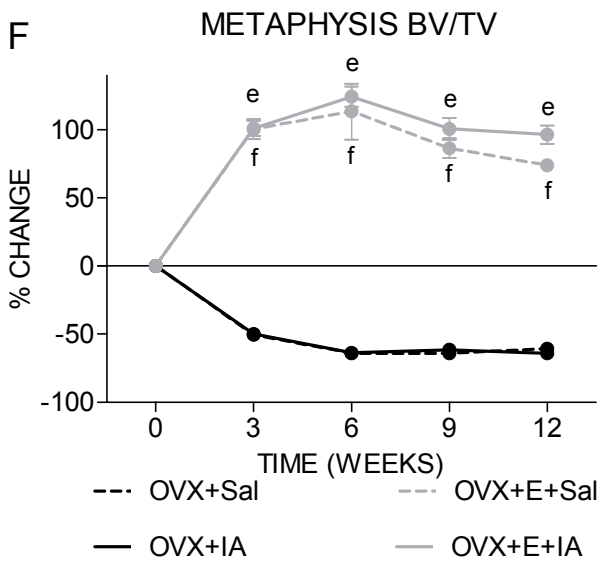

Supplement: MOESM5 [file 9693314]
